# Supplementary material for: Mutant Kras- and p16-regulated NOX4 activation overcomes metabolic checkpoints in development of pancreatic ductal adenocarcinoma
Source: PubMed Central journal article supplement (PMC5333128; doi:10.1038/ncomms14437), 2017-02-24
Supplement: ncomms14437-s1.pdf [file ncomms14437-s1.pdf]

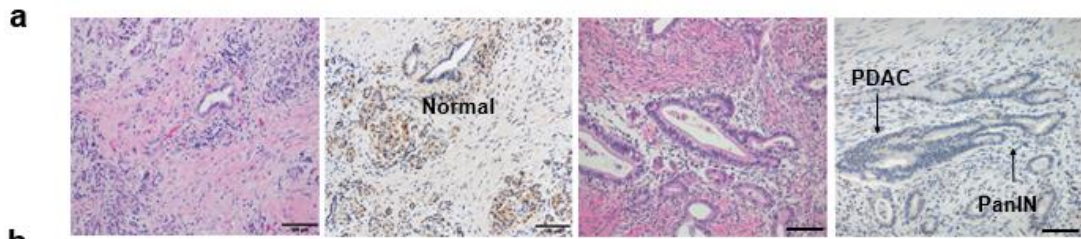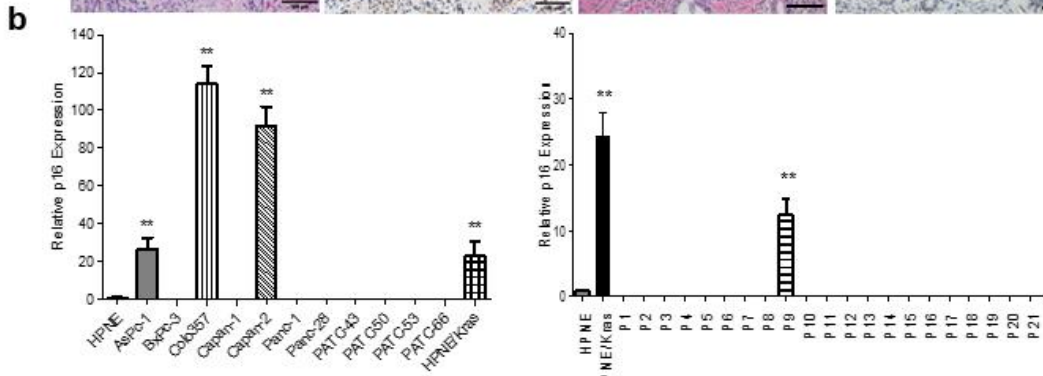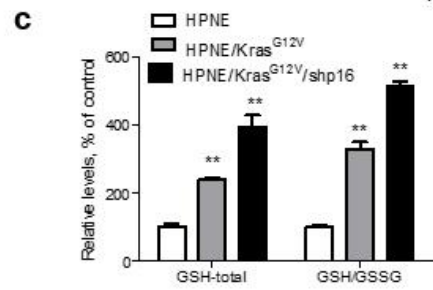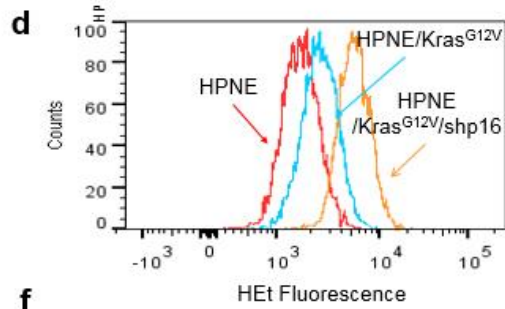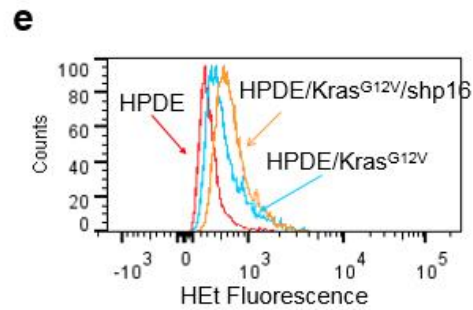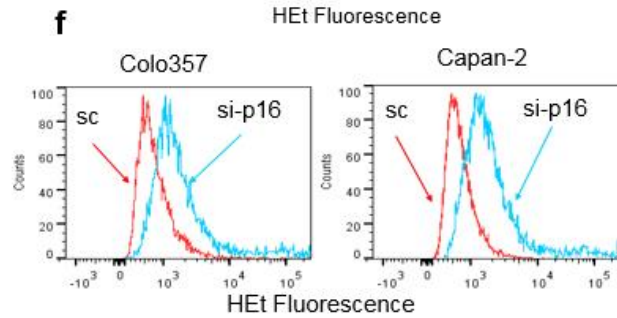

**Supplementary Figure 1. Measurements of p16 expression in PDAC, and the redox status in Kras activated or p16 inactivated HPNE, HPDE and PDAC cells.** (a) Representative IHC staining shows the loss of p16 expression in PanIN and PDAC tissues. (Scale bar: 100  $\mu$ m). (b) The expression of p16 in PDAC cell lines and tissues was analyzed by qPCR assay. (c) The cellular GSH level and GSH/GSSG ratio was compared in these cells. GSH, reduced glutathione; GSSG, oxidized glutathione. (d, e, f) Representative histograms of  $O_2^-$  levels in indicated cells as detected by the fluorescent probe Het. Each bar represents the mean  $\pm$  s.d. (N=3). \*\* $P < 0.01$  for indicated comparison (Student unpaired  $t$ -test).

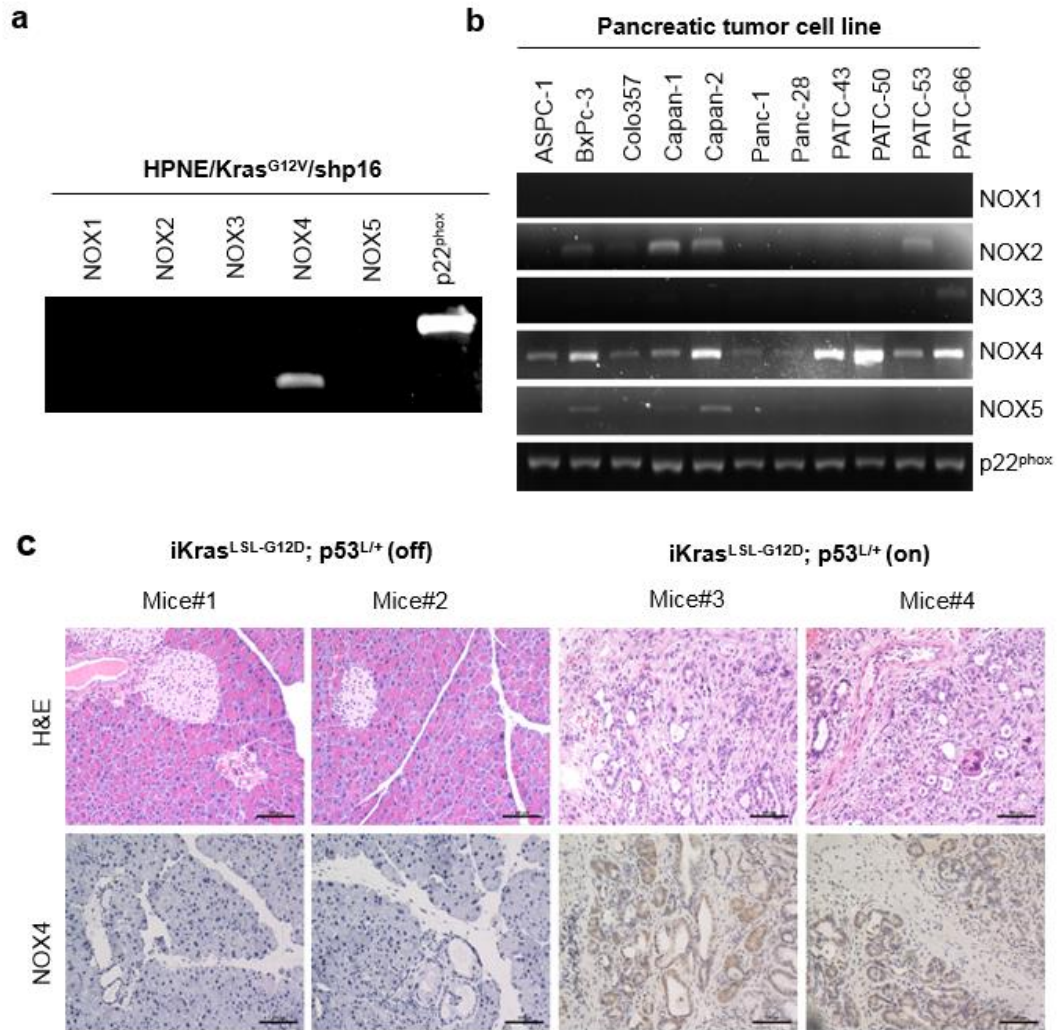

**Supplementary Figure 2. NOX4 was specially expressed in PDAC cells, and also increased in transgenic iKras; p53<sup>L/+</sup> mice.** (a, b) RT-PCR analysis the mRNA expression levels of NOX family members (NOX1, NOX2, NOX3, NOX4, NOX5, p22<sup>phox</sup>) in HPNE/Kras<sup>G12V</sup>/shp16 and 11 different PDAC cells. (c) Representative IHC staining with H&E or anti-NOX4 antibody in sections of formalin-fixed PDAC from transgenic *iKras*; *p53*<sup>L/+</sup> mice (Scale bar: 100  $\mu$ m) .

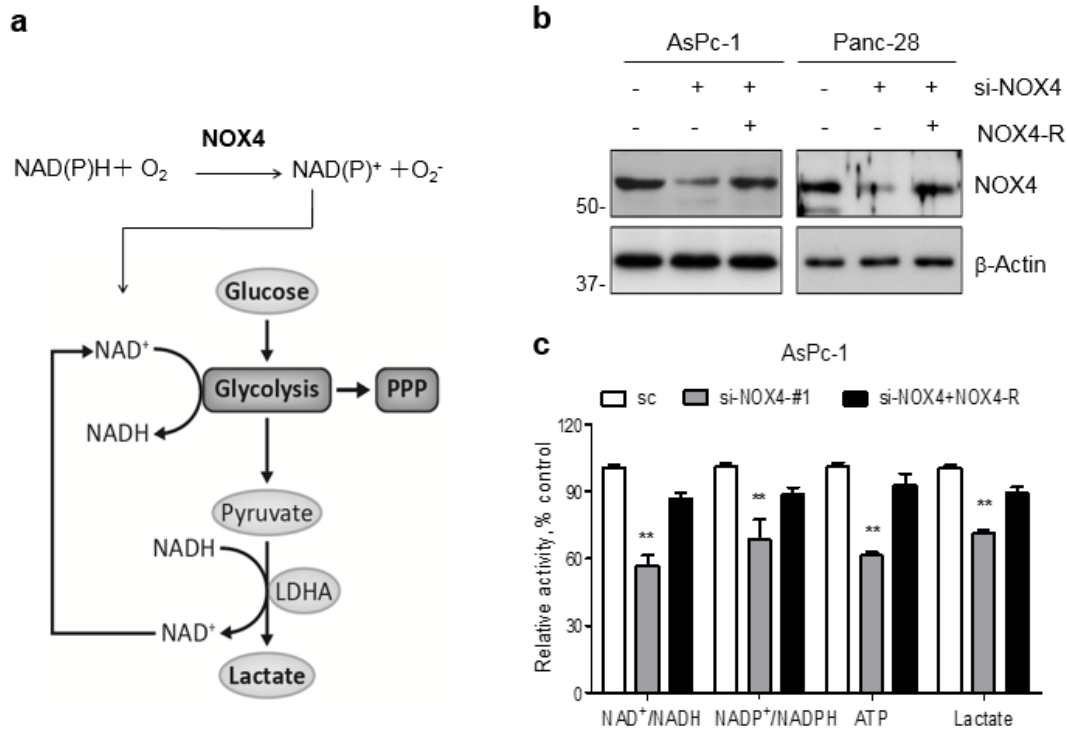

**Supplementary Figure 3. Upregulation of NOX4 is required for regeneration of NAD<sup>+</sup> to maintain high glycolytic activity in PDAC cells.**

(a) Role of NAD<sup>+</sup> in supporting glycolysis. LDHA preferentially converts accumulating pyruvate to lactate, thereby regenerating NAD<sup>+</sup> from NADH to maintain glycolysis. (b) Immunoblotting analysis showed the expression level of NOX4 in AsPc-1 cells after siRNA depletion of NOX4 or co-expressing siRNA resistant NOX4 (NOX4-R). (c) Glycolytic activity (NAD<sup>+</sup>/NADH, NADP<sup>+</sup>/NADPH, ATP and Lactate level) was measured after siRNA depletion of NOX4 or co-expressing NOX4-R in AsPc-1 cells. Each bar represents the mean  $\pm$  s.d. (n=3). \*\**P* < 0.01 for indicated comparison (one-way analysis of variance (ANOVA) with the Newman Keul's multiple comparison test).

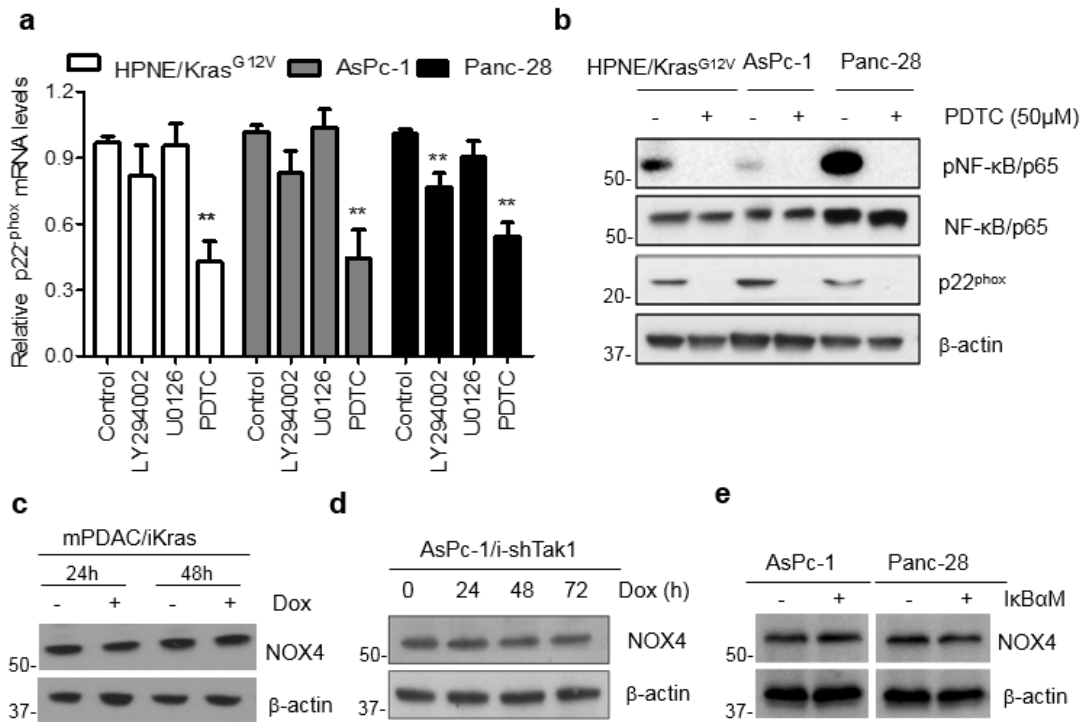

**Supplementary Figure 4. Mutant Kras upregulates p22<sup>phox</sup> expression via the NF-κB pathway.** (a) The expression of p22<sup>phox</sup> mRNA level was analyzed by qPCR in the indicated cells treated with Akt inhibitor LY294002 (10μM), ERK1/2 inhibitor U0126 (10μM) and NF-κB inhibitor PDTC (20μM) for 48h. (b) The expression of p22<sup>phox</sup> protein level was analyzed by Immunoblotting in the indicated cells treated with NF-κB inhibitor PDTC (20μM) for 48h. (c) The expression NOX4 was analyzed by immunoblotting in mPDAC/iKras cells with doxycycline-inducible mutant Kras. (d, e) The expression of NOX4 was analyzed by immunoblotting in indicated cells. β-actin was used as the internal loading control. Each bar represents the mean ± s.d. (n=3). \*\**P* < 0.01 for indicated comparison (Student unpaired *t*-test).

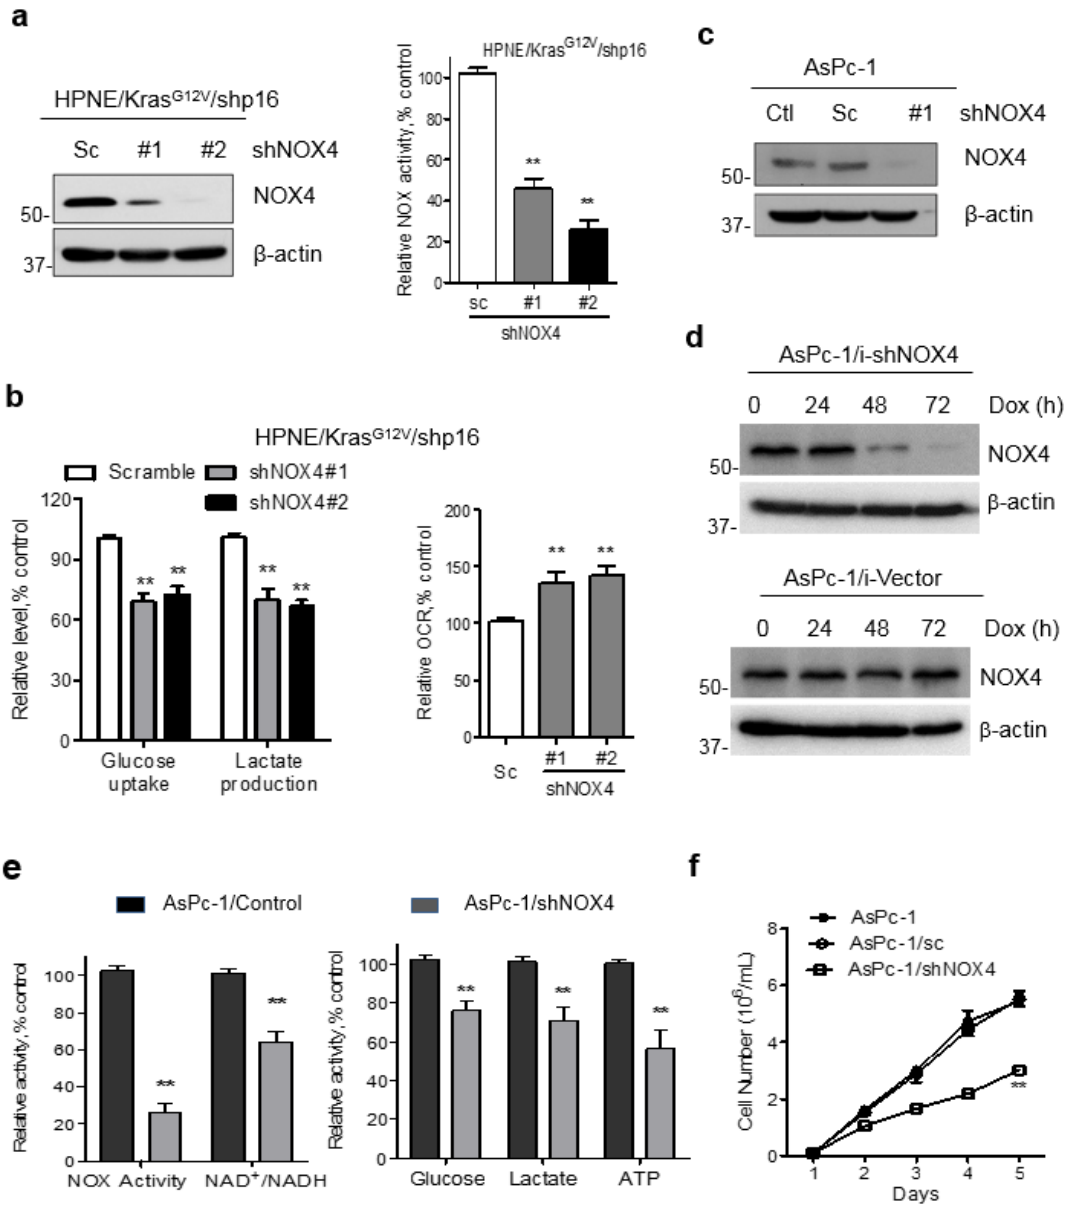

**Supplementary Figure 5. Suppression of NOX4 leads to metabolic disruption and decreases pancreatic cancer cell growth.** (a) The NOX4 knockdown efficiency and NOX activity was analyzed in NOX4-silenced HPNE/Kras<sup>G12V</sup>/shp16 cells. (b) Glucose uptake and lactate production, and oxygen consumption rate were measured in primary NOX4-silenced HPNE/Kras<sup>G12V</sup>/shp16 cells derived from subcutaneous xenograft mice. (c, d) The expression of NOX4 was analyzed by immunoblotting in indicated cells. (e, f) NOX activity, NAD<sup>+</sup>/NADH ratios and growth curve were determined in NOX4-silenced AsPc-1 cells. Each bar represents the mean  $\pm$  s.d. (n=3). \*\* $P < 0.01$  for indicated comparison (Student unpaired  $t$ -test).



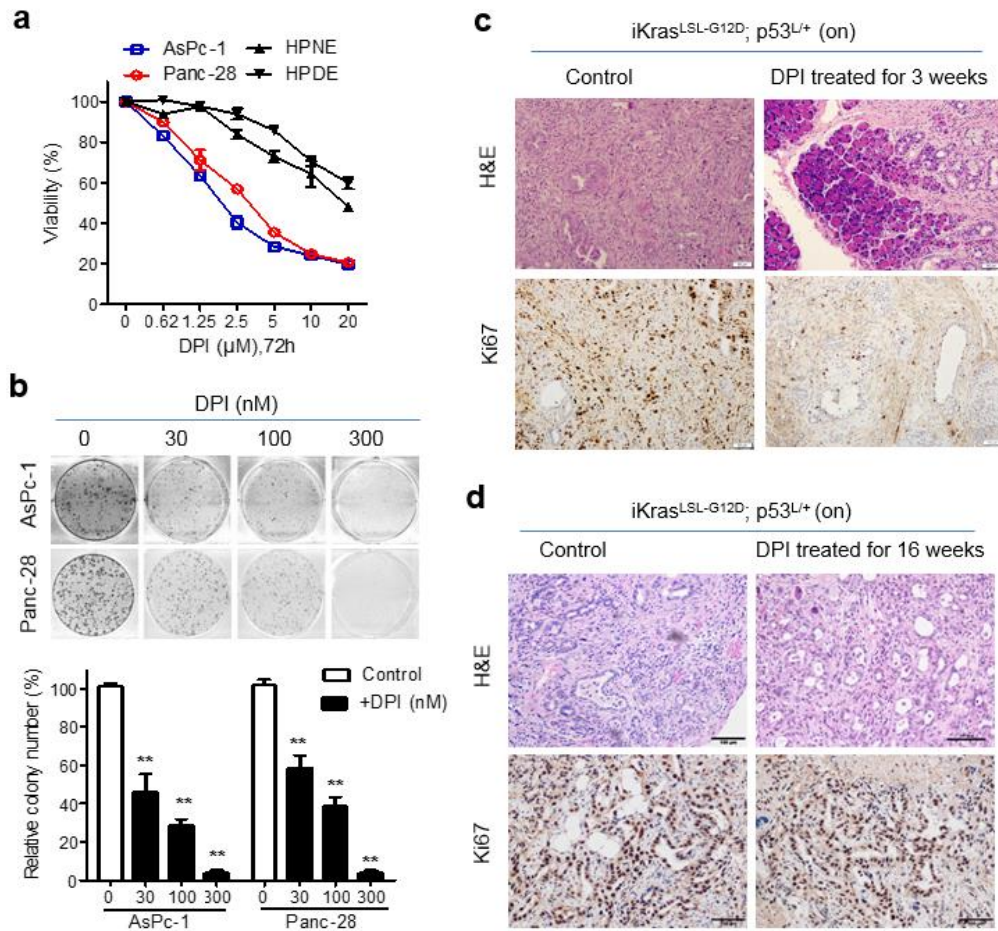

**Supplementary Figure 6. DPI treatment for long time develops resistance in transgenic *iKras; p53<sup>L/+</sup>* mice.** (a) Cell viability was measured by MTS assay in indicated cells incubated with DPI for 72 h. (b) Images and quantification of the indicated cells incubated with DPI for 2 weeks were analyzed in a clonogenic assay. (c) Paraffin-embedded tumor sections from *iKras<sup>LSL-G12D</sup>; p53<sup>L/+</sup>* mice, treated with or without DPI for indicated time, were stained with H&E or anti-Ki67 antibody (Scale bar: 100  $\mu\text{m}$ ). Each bar represents the mean  $\pm$  s.d. (n=3). \*\* $P < 0.01$  for indicated comparison (Student unpaired *t*-test).



**Fig. 1a**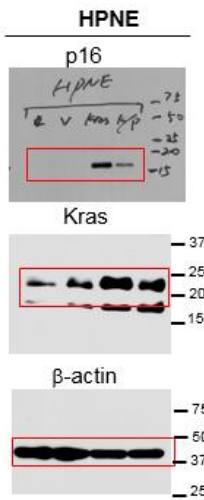**Fig. 1d**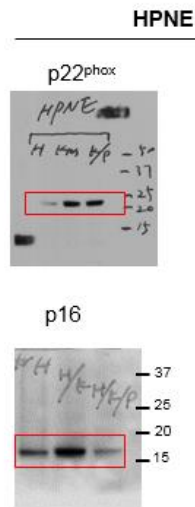**Fig. 1f**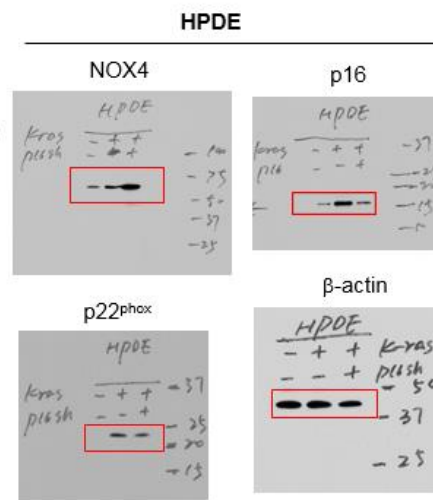**Fig. 1h**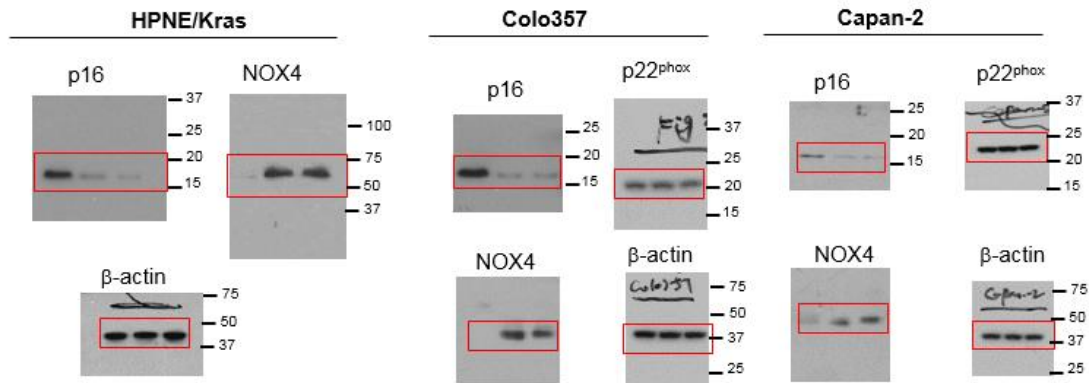**Fig. 2c**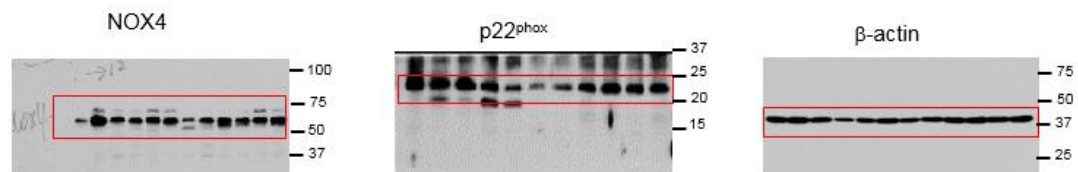

**Supplementary Figure 7. Full scans of uncropped blots presented in the main paper.** Red boxes indicate the cropped regions. Molecular weight markers are indicated in kDa.

**Fig. 3c**

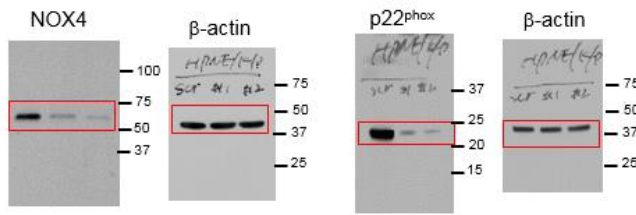

**Fig. 3g**

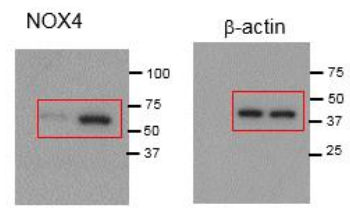

**Fig. 4a**

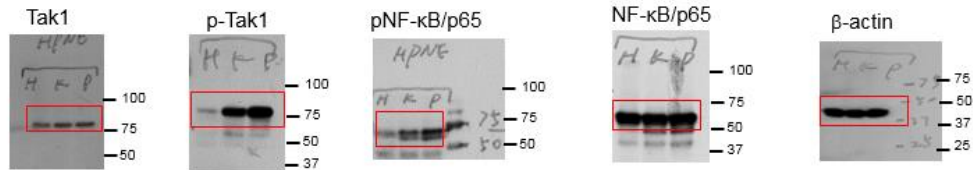

**Fig. 4b**

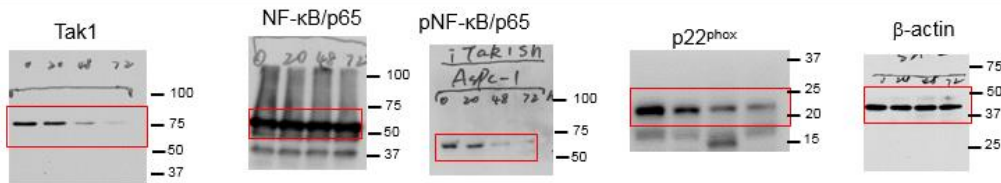

**Fig. 4c**

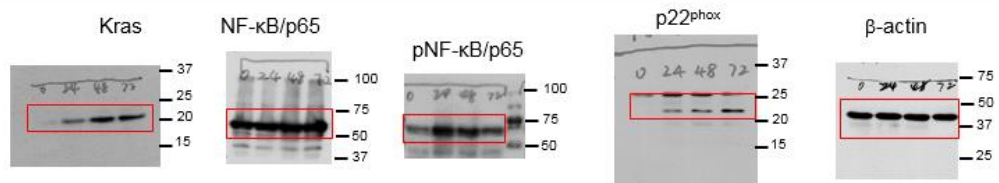

**Supplementary Figure 7. Continued**

**Fig. 4e**

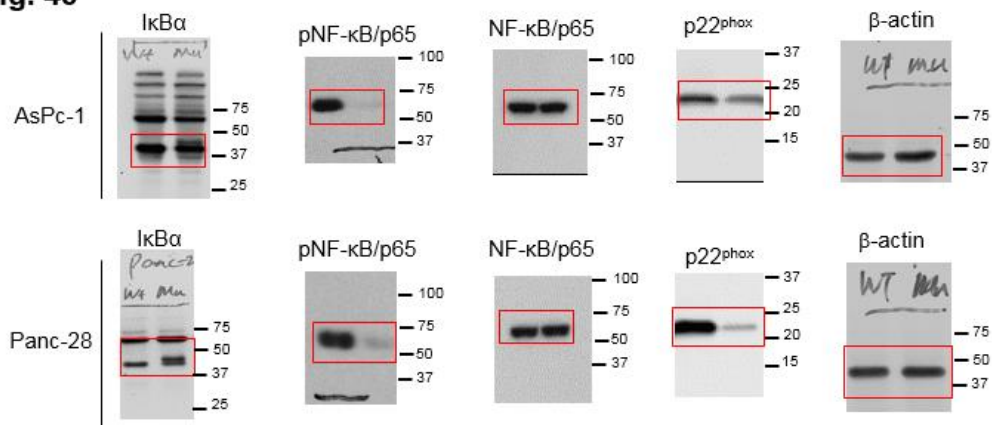

**Fig. 4g**

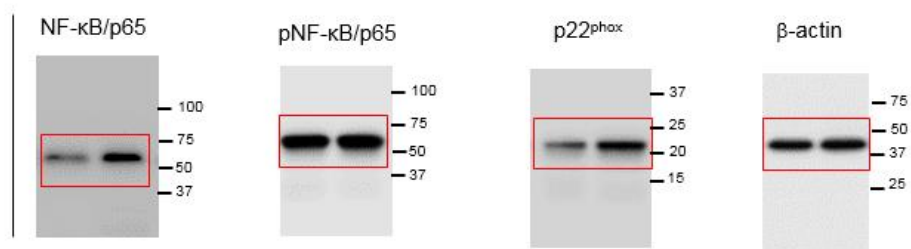

**Fig. 5a**

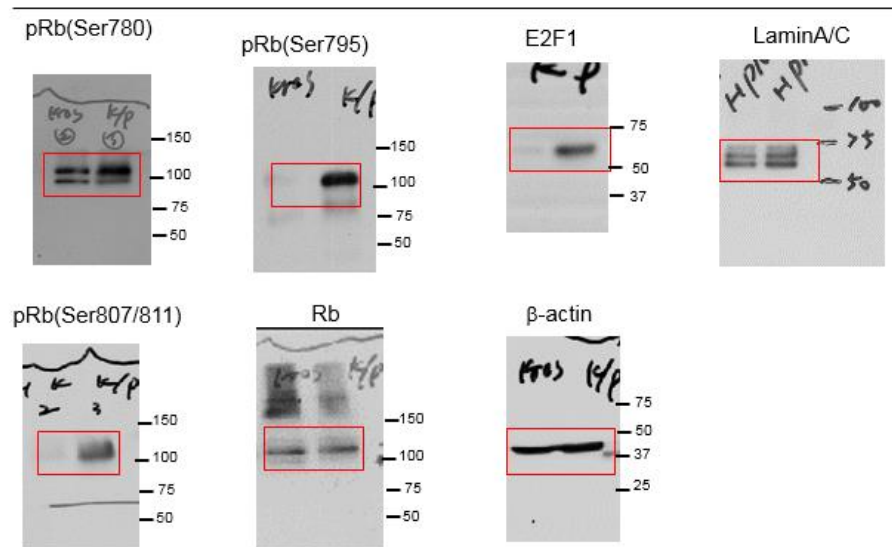

**Supplementary Figure 7. Continued**

### Supplementary Table 1.

Highly increased genes (top 10) or decreased genes (top 10) in

HPNE/Kras<sup>G12V</sup>/shp16 cells compared with HPNE/Kras<sup>G12V</sup> cells identified

using cDNA microarray.

| Rank | Gene name   | Description                                        | LogRatio |
|------|-------------|----------------------------------------------------|----------|
| 1    | CRK         | v-crk sarcoma virus CT10 oncogene homolog          | 2.46     |
| 2    | FAM101B     | family with sequence similarity 101, member B      | 2.37     |
| 3    | <b>NOX4</b> | <b>NADPH oxidase 4</b>                             | 2.31     |
| 4    | MPDZ        | multiple PDZ domain protein                        | 2.25     |
| 5    | IL13RA2     | interleukin 13 receptor, alpha 2                   | 2.25     |
| 6    | BVES        | blood vessel epicardial substance                  | 2.13     |
| 7    | ROBO1       | roundabout, axon guidance receptor, homolog 1      | 2.13     |
| 8    | TCF7L1      | transcription factor 7-like 1                      | 2.11     |
| 9    | PGR         | progesterone receptor                              | 2.09     |
| 10   | TRAM1L1     | translocation associated membrane protein 1-like 1 | 2.05     |
| 1    | NEFL        | Neurofilament, light polypeptide                   | -3.11    |
| 2    | SH3GL3      | SH3-domain GRB2-like 3                             | -2.63    |
| 3    | WWC1        | WW and C2 domain containing 1                      | -2.52    |
| 4    | ARMC4       | Armadillo repeat containing 4                      | -2.50    |
| 5    | EPDR1       | Ependymin related protein 1 (zebrafish)            | -2.46    |
| 6    | PDZD2       | PDZ domain containing 2                            | -2.46    |
| 7    | VNN1        | Vanin 1                                            | -2.32    |
| 8    | NFE2L3      | Nuclear factor (erythroid-derived 2)-like 3        | -2.29    |
| 9    | FBN2        | Fibrillin 2                                        | -2.22    |
| 10   | NHS         | Nance-Horan syndrome                               | -2.15    |

## Supplementary Table 2.

Quantitative PCR primer sequences of assessed genes.

| Gene                | Forward primer                | Reverse primer               | Length |
|---------------------|-------------------------------|------------------------------|--------|
| Kras                | 5'-agagaggcctgctgaaaatg-3'    | 5'-agtctgcatggagcaggaaa-3'   | 703 bp |
| p16                 | 5'-cccaacgcaccgaatagtta-3'    | 5'-accagcgtgtccaggaag-3'     | 173 bp |
| NOX1                | 5'-ttgtttggttagggctgaatgt-3'  | 5'-gccaatgttgaccaaggatttt-3' | 106 bp |
| NOX2                | 5'-accgggtttatgatattccacct-3' | 5'-gatttcgacagactggcaaga-3'  | 135 bp |
| NOX3                | 5'-cgtggcgcatttctcaacc-3'     | 5'-gctctcgttaggggtgtgc-3'    | 106 bp |
| NOX4                | 5'-tgtgccgaacactcttggc-3'     | 5'-acatgcacgctgagaaaata-3'   | 136 bp |
| NOX5                | 5'-ggctcaagtctaccactgga-3'    | 5'-gaaccgtgtaccagccaat-3'    | 195 bp |
| p22 <sup>phox</sup> | 5'-gtgtttgtgtgcctgctggagt-3'  | 5'-ctgggcggctgcttgatggt-3'   | 320 bp |
| NF-κB               | 5'-atgtggagatcattgagcagc-3'   | 5'-cctggcctgtgtagccatt-3'    | 151 bp |
| E2F1                | 5'-acgctatgagacctcactgaa-3'   | 5'-tcctgggtcaaccctcaag-3'    | 249 bp |
| E2F2                | 5'-cgtccctgagttcccaacc-3'     | 5'-gcgaagtgcataccgagtctt-3'  | 107 bp |
| E2F3                | 5'-agaaagcggatcatcagtacct-3'  | 5'-tggacttcgtagtgcagctct-3'  | 76 bp  |
| E2F4                | 5'-caccaccaagttcgtgtccc-3'    | 5'-gcgtacagctagggtgtca-3'    | 85 bp  |
| E2F5                | 5'-gggctgctcactaccaagttc-3'   | 5'-cctacaccttccactggatact-3' | 188 bp |
| β-actin             | 5'-catgtacgttgctatccaggc-3'   | 5'-ctccttaatgtcacgcacgat-3'  | 250 bp |
